# Supplementary material
Source: PubMed Central journal article supplement (PMC6496110)
Supplement: AAC.01824-18-s0001.pdf [file AAC.01824-18-s0001.pdf]

1 Table S1. Primers targeting the regions containing the predicted SNPs designed based on  
 2 the reference genome of *Escherichia coli* CVM N37067PS.

| No.   | Target mutation | Sequence 5'-3'                                        | Amplicon size (bp) |
|-------|-----------------|-------------------------------------------------------|--------------------|
| SNP1  | A530T           | F-CCTTGTGCCAGGTAAGTACAGAG<br>R-ATTATCCCTGGCGGCGTTAG   | 439                |
| SNP2  | G664A           | F-AAAGTATGGCGAACCGACGC<br>R-TATCTTCCAGGCGTTGCTCCAG    | 416                |
| SNP3  | T364G           | F-ACACAGGAGCATCTCGATCG<br>R-AGTTGCCGCGTTGGTGTTG       | 332                |
| SNP4  | A208G           | F-TTTATCGACGATGCGATTGAAGC<br>R-GCGGTTCCAGCAAATTGTG    | 302                |
| SNP5  | T575A           | F-ACAGCCAGGTGATACGTCCAC<br>R-ATTTGCACCTGCTGCATCGC     | 416                |
| SNP6  | A248T           | F-TTCATTCAGCCACTCGCTCAATG<br>R-TGGCATTGCCGCTTGACG     | 387                |
| SNP7  | G53T            | F-AAACTTCAATGCCACCGGCG<br>R-GTTGAGATGGCCGATCCGATG     | 402                |
| SNP8  | G241T           | F-ATGAGCGATATGGCAGAGCG<br>R-TTTCGGCTCCTGCAAAGTGC      | 436                |
| SNP9  | A1541G          | F-CCTCATTGCCAACACTAAACAGG<br>R-GCATGACAAATTCCTGCCCCTC | 357                |
| SNP10 | C739T           | F-GTCAGGACACCGATGAAGACAG<br>R-ACATAGCTTTCGCCAGCGG     | 343                |
| SNP11 | C605T           | F-AACGCAGTACCTGCAACTGTAG<br>R-TGCTGATTATGCGTCTGCTACC  | 410                |
| SNP12 | G374A           | F-ACCGTAACATTTCTTGATCCAGC<br>R-ACCGTTGAAATTCAGTGTGC   | 397                |

3  
 4  
 5  
 6  
 7

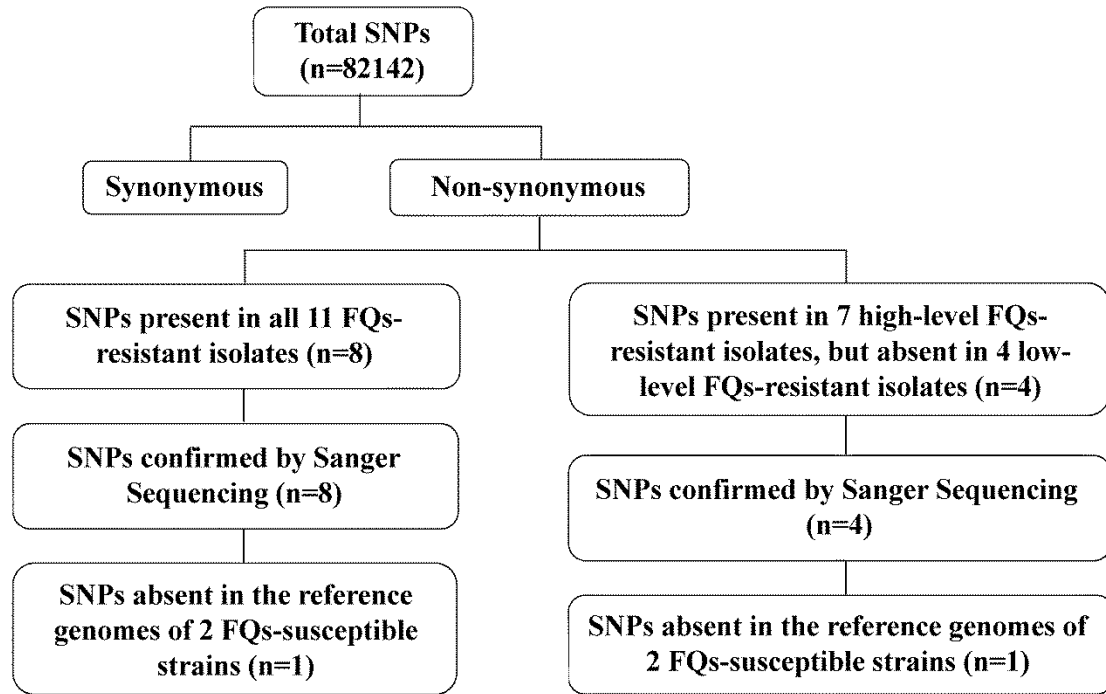

8

9 **Fig. S1.** Screening work flow of key SNPs.

10

11

12

13

14

15

16

17

18

19

20

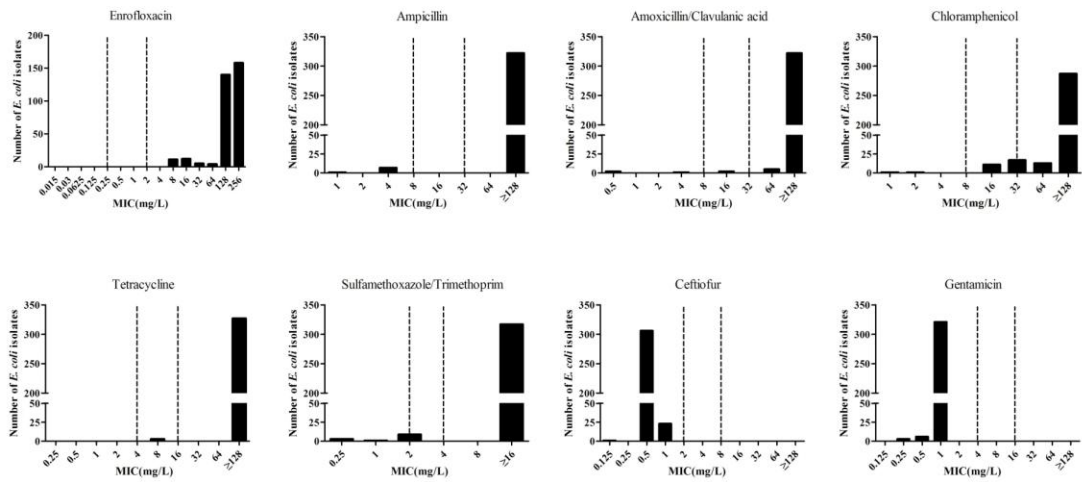

21

22 **Fig. S2.** MIC distributions of the *E. coli* isolates to enrofloxacin, amoxicillin/clavulanic  
 23 acid, ampicillin, sulfamethoxazole/trimethoprim, gentamicin, tetracycline,  
 24 chloramphenicol and cefiofur. The dashed lines indicated the susceptible and resistant  
 25 breakpoints.

26

27

28
